# Supplementary material
Source: PubMed Central journal article supplement (PMC3352535)
Supplement: eva0004-0685-SD1.pdf [file eva0004-0685-SD1.pdf]

**Supplementary Table S1.** Wheat references included in the analysis.

| Species (n) <sup>1</sup> | Cultivars included in the study <sup>2</sup>                                                                                                                                                                                                    |
|--------------------------|-------------------------------------------------------------------------------------------------------------------------------------------------------------------------------------------------------------------------------------------------|
| <b>France</b>            |                                                                                                                                                                                                                                                 |
| <i>T. aestivum</i> (12)  | 67510; Athos; Bayard 80240; Blé du Mesnil; Bocquiau; Cloches 32; Hybride à courte paille; Languedoc; Lignée 6696; Renfort; Rex; YGA Blondeau                                                                                                    |
| <i>T. durum</i> (1)      | Lez                                                                                                                                                                                                                                             |
| <i>T. turgidum</i> (16)  | Armet; Ixos; Lloyd; Néodur; No 6; Osiris; Pharaons; Senostris IV; Villemur; Géant du Milanais; col. Baillargues I; col. Baillargues II; col. Baillargues III; col. Lac Cécèles; col. Murviels les Montpellier; col. Vendargues                  |
| <b>Italy</b>             |                                                                                                                                                                                                                                                 |
| <i>T. aestivum</i> (18)  | 100/M Morgex; Attilio Fabrini; Clavel 2; Conte Marzotto; Falcone J.BO 220; Fortunato; Freccia; Generoso 7; Gentil Rosso 4; Impeto; Jacometti 49; Libellula; Nobel; Roma; S.15 Glutinoso; Salto (Tiriamodiritto); San Pastore; ST.774 Ibrido 440 |
| <i>T. spelta</i> (3)     | No 1; col. 43.59°N 11.57°E; col. 44.69°N 10.03°E                                                                                                                                                                                                |
| <i>T. turgidum</i> (2)   | Campania 22; Civitella 204                                                                                                                                                                                                                      |
| <b>Spain</b>             |                                                                                                                                                                                                                                                 |
| <i>T. aestivum</i> (7)   | Aragon 03; Asturie H'3; Caspino 1; Ex Cabezorro; Montsec; Pane 247; Pane 3                                                                                                                                                                      |
| <i>T. spelta</i> (2)     | AST 17C; AST 9B                                                                                                                                                                                                                                 |
| <i>T. durum</i> (4)      | Candéal; Lucena 45; No 9; Torcal                                                                                                                                                                                                                |
| <i>T. turgidum</i> (5)   | Asturie B3; Asturie B4; Asturie H'D; Asturie L2; Asturie L6                                                                                                                                                                                     |

<sup>1</sup> Between brackets: number of samples

<sup>2</sup> Wheat samples that were collected during field collections are marked as "col." - Geographical coordinates (decimal degrees) or location name are given in such cases. *Triticum aestivum* and *T. spelta* and are collectively referred to as hexaploid wheat in the present study. *Triticum durum* and *T. turgidum* are referred to as tetraploid wheat.
