# Supplementary material
Source: PubMed Central journal article supplement (PMC3352535)
Supplement: eva0004-0685-SD2.pdf [file eva0004-0685-SD2.pdf]

**Supplementary Table S2.** Distribution of STRUCTURE admixture scores at the population level.

| Population                    | N                          | Distance to wheat cultivation <sup>1</sup> | Distribution of P <sub>wheat</sub> <sup>2</sup> |         |         |         |         |         |         |  |
|-------------------------------|----------------------------|--------------------------------------------|-------------------------------------------------|---------|---------|---------|---------|---------|---------|--|
|                               |                            |                                            | 0.0-0.1                                         | 0.1-0.2 | 0.2-0.3 | 0.3-0.4 | 0.4-0.5 | 0.5-0.6 | 0.6-0.7 |  |
| <b><i>Ae. geniculata</i></b>  |                            |                                            |                                                 |         |         |         |         |         |         |  |
| <i>France</i>                 | FR1                        | 17                                         | C 1m                                            | 17      |         |         |         |         |         |  |
|                               | FR2                        | 11                                         | C 50m                                           | 11      |         |         |         |         |         |  |
|                               | FR3                        | 11                                         | D 600m                                          | 7       | 4       |         |         |         |         |  |
|                               | FR4                        | 16                                         | D 1.3km                                         | 16      |         |         |         |         |         |  |
| <i>Italy</i>                  | IT3                        | 11                                         | C 1m                                            | 11      |         |         |         |         |         |  |
|                               | IT5                        | 17                                         | D 120m                                          | 17      |         |         |         |         |         |  |
|                               | IT6                        | 4                                          | D 400m                                          | 4       |         |         |         |         |         |  |
|                               | IT7                        | 12                                         | D 1.2km                                         | 12      |         |         |         |         |         |  |
| <i>Spain</i>                  | SP1                        | 23                                         | C 1m                                            | 23      |         |         |         |         |         |  |
|                               | SP2                        | 15                                         | C 1m                                            | 15      |         |         |         |         |         |  |
|                               | SP3                        | 5                                          | C 1m                                            | 5       |         |         |         |         |         |  |
|                               | SP6                        | 22                                         | C 1m                                            | 21      |         |         | 1       |         |         |  |
|                               | SP7                        | 5                                          | C 10m                                           | 5       |         |         |         |         |         |  |
|                               | SP9                        | 11                                         | C 20m                                           | 11      |         |         |         |         |         |  |
|                               | SP10                       | 14                                         | C 20m                                           | 14      |         |         |         |         |         |  |
|                               | SP12                       | 3                                          | D 800m                                          | 3       |         |         |         |         |         |  |
|                               | SP13                       | 25                                         | D 2.4km                                         | 25      |         |         |         |         |         |  |
|                               | SP15                       | 13                                         | D >5km                                          | 12      | 1       |         |         |         |         |  |
|                               | SP16                       | 5                                          | D >5km                                          | 5       |         |         |         |         |         |  |
|                               | SP17                       | 7                                          | D 10.4km                                        | 6       | 1       |         |         |         |         |  |
|                               | <b><i>Ae. neglecta</i></b> |                                            |                                                 |         |         |         |         |         |         |  |
| <i>Croatia</i>                | HR1                        | 2                                          | C 10m                                           |         |         |         |         | 2       |         |  |
|                               | HR2                        | 8                                          | C 30m                                           | 4       | 1       | 1       | 1       | 1       |         |  |
| <i>Italy</i>                  | IT1                        | 9                                          | C 1m                                            | 6       | 1       |         |         | 1       | 1       |  |
|                               | IT2                        | 15                                         | C 1m                                            | 15      |         |         |         |         |         |  |
|                               | IT3                        | 1                                          | C 1m                                            | 1       |         |         |         |         |         |  |
|                               | IT6                        | 1                                          | D 400m                                          | 1       |         |         |         |         |         |  |
| <i>Spain</i>                  | IT8                        | 12                                         | D >15km                                         | 11      | 1       |         |         |         |         |  |
|                               | SP4                        | 11                                         | C 1m                                            | 9       |         | 1       |         | 1       |         |  |
|                               | SP5                        | 7                                          | C 1m                                            | 4       | 2       |         |         | 1       |         |  |
|                               | SP11                       | 14                                         | D 200m                                          | 14      |         |         |         |         |         |  |
|                               | SP12                       | 12                                         | D 800m                                          | 10      | 1       | 1       |         |         |         |  |
| <b><i>Ae. triuncialis</i></b> |                            |                                            |                                                 |         |         |         |         |         |         |  |
| <i>Croatia</i>                | HR1                        | 10                                         | C 10m                                           | 6       | 1       | 1       | 1       | 1       |         |  |
|                               | HR2                        | 9                                          | C 30m                                           | 8       | 1       |         |         |         |         |  |
| <i>Italy</i>                  | IT4                        | 12                                         | D 100m                                          | 12      |         |         |         |         |         |  |
| <i>Spain</i>                  | SP1                        | 4                                          | C 1m                                            | 3       |         |         |         |         | 1       |  |
|                               | SP2                        | 6                                          | C 1m                                            | 5       | 1       |         |         |         |         |  |
|                               | SP3                        | 13                                         | C 1m                                            | 6       | 3       | 1       | 2       | 1       |         |  |
|                               | SP6                        | 9                                          | C 1m                                            | 7       |         | 1       |         | 1       |         |  |
|                               | SP7                        | 9                                          | C 10m                                           | 8       |         |         |         |         | 1       |  |
|                               | SP8                        | 7                                          | C 10m                                           | 6       |         |         | 1       |         |         |  |
|                               | SP9                        | 7                                          | C 20m                                           | 6       | 1       |         |         |         |         |  |
|                               | SP11                       | 7                                          | D 200m                                          | 7       |         |         |         |         |         |  |
|                               | SP12                       | 8                                          | D 800m                                          | 5       |         | 1       | 1       | 1       |         |  |
|                               | SP14                       | 14                                         | D 2.8km                                         | 14      |         |         |         |         |         |  |
|                               | SP15                       | 7                                          | D >5km                                          | 7       |         |         |         |         |         |  |
|                               | <i>Turkey</i>              | TU1                                        | 11                                              | D >15km | 11      |         |         |         |         |  |

<sup>1</sup> Classified according to distance to wheat cultivation : C = "Close to wheat" (closer than 50 m) or D = "Distant from wheat" (farther than 50 m).

<sup>2</sup> P<sub>wheat</sub> distributions were computed considering seven balanced classes (i.e. P<sub>wheat</sub> = 0 to P<sub>wheat</sub> = 0.7, with 0.1 as interval between two adjacent classes). Results are displayed as counts of samples.
